# Supplementary material
Source: PubMed Central journal article supplement (PMC3715746)
Supplement: NIHMS469365-supplement-Supplementary_Assay.pdf [file NIHMS469365-supplement-Supplementary_Assay.pdf]

## **Carrizosa et al. Legends for Supplemental Videos**

**SUPPLEMENTAL VIDEOS 1 AND 2.** Actin dynamics in control T cells. Jurkat T cells stably expressing GFP-actin were transfected with empty suppression vector. After 72 hours, cells were plated on coverslips coated with anti-CD3 and imaged for 5 minutes. A Z-stack of images near the plane of the coverslip was collected every 5 seconds. Images are displayed as maximum intensity projections, played back at 15 frames/second.

**SUPPLEMENTAL VIDEOS 3 AND 4.** Actin dynamics in Itk-suppressed T cells. Jurkat T cells stably expressing GFP-actin were transfected with Itk suppression vector. After 72 hours, cells were plated on coverslips coated with anti-CD3 and imaged for 5 minutes. A Z-stack of images near the plane of the coverslip was collected every 5 seconds. Images are displayed as maximum intensity projections, played back at 15 frames/second.

**SUPPLEMENTAL VIDEOS 5 AND 6.** Actin dynamics in HS1-suppressed T cells. Jurkat T cells stably expressing GFP-actin were transfected with HS1 suppression vector. After 72 hours, cells were plated on coverslips coated with anti-CD3 and imaged for 5 minutes. A Z-stack of images near the plane of the coverslip was collected every 5 seconds. Images are displayed as maximum intensity projections, played back at 15 frames/second.

**SUPPLEMENTAL VIDEOS 7 AND 8.** PLC $\gamma$ 1 microcluster dynamics in control T cells. Jurkat T cells stably expressing PLC $\gamma$ 1-eYFP were transfected with the empty suppression vector. After 72 hours, cells were plated on coverslips coated with anti-CD3 and imaged for 3

minutes. A Z-stack of images near the plane of the coverslip was collected every 5 seconds. Images are displayed as maximum intensity projections, played back at 10 frames/second.

**SUPPLEMENTAL VIDEOS 9 AND 10.** PLC $\gamma$ 1 microcluster dynamics in HS1-suppressed T cells. Jurkat T cells stably expressing PLC $\gamma$ 1-eYFP were transfected with HS1 suppression vector. After 72 hours, cells were plated on coverslips coated with anti-CD3 and imaged for 3 minutes. A Z-stack of images near the plane of the coverslip was collected every 5 seconds. Images are displayed as maximum intensity projections, played back at 10 frames/second.
